# Supplementary material for: Elevated Homocysteine and Cognitive Impairment in Parkinson's Disease: A Systematic Review and Meta-Analysis
Source: Research Square preprint supplement (doi:10.21203/rs.3.rs-6581817/v1), 2025-05-19
Supplement: Supplementary file 1 [file 6964e80b6760eb2b4e31d001.pdf]

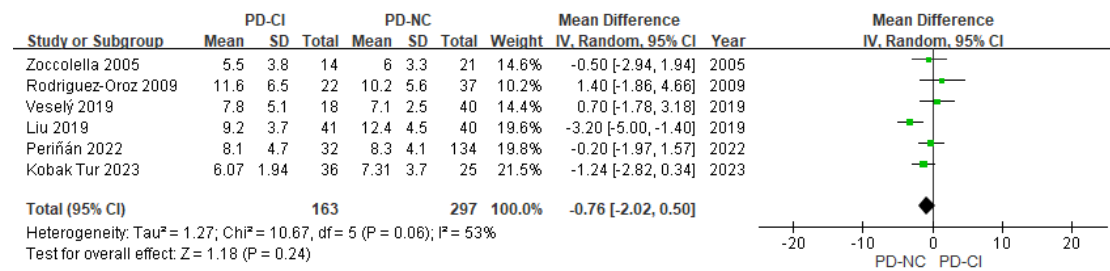

Supplementary Fig. 1. Exploratory forest plot comparing folic acid levels (ng/mL) between PD-CI and PD-NC patients in studies where data were available.

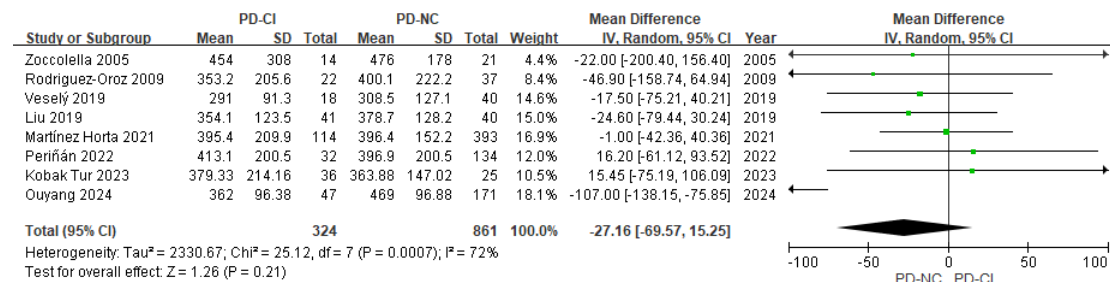

Supplementary Fig. 2. Exploratory forest plot comparing in Vitamin B12 levels (pg/mL) between PD-CI and PD-NC patients in studies where data were available.
